# Supplementary material for: Six-Month Synbio® Administration Affects Nutritional and Inflammatory Parameters of Older Adults Included in the PROBIOSENIOR Project
Source: MDPI journal article supplement (doi:10.3390/microorganisms11030801), 2023-03-21
Supplement: s1 [file s1]

## Supplementary Material

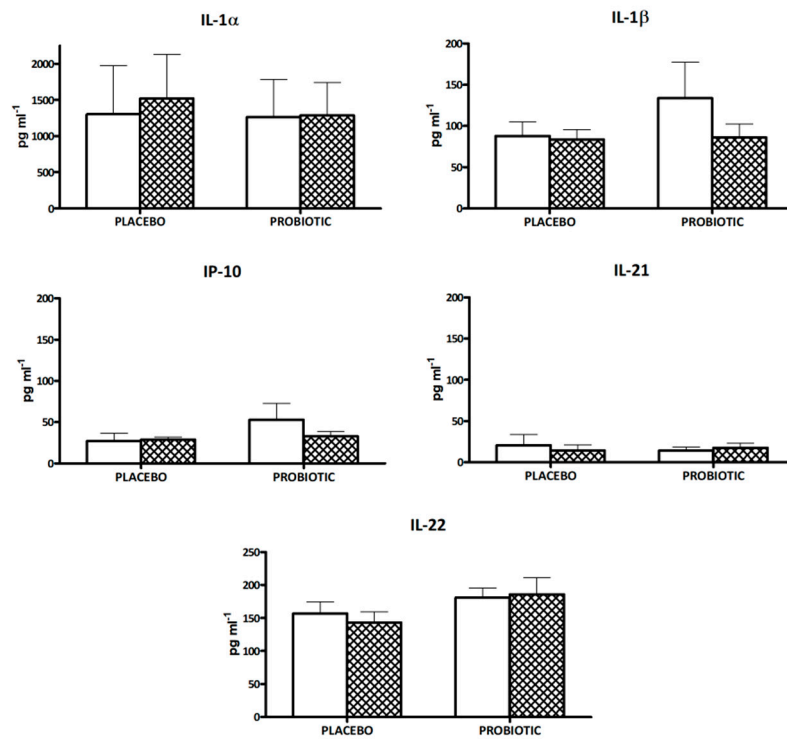

**Figure S1.** Fecal cytokines levels (pg mL<sup>-1</sup>) in the two groups of volunteers (placebo and probiotic), before and after the supplementation (□ T0 and ▨ T1).
